# Supplementary material for: Design and synthesis of all diastereomers of cyclic pseudo-dipeptides as mimics of cyclic CXCR4 pentapeptide antagonists
Source: Royal Society of Chemistry journal article supplement (doi:10.1039/b702649h), 2007-01-01
Supplement: b702649h.pdf [file b702649h.pdf]

## Supplementary material

### Design and Synthesis of all Diastereomers of Cyclic Pseudo-Dipeptides as Mimic of Cyclic CXCR4 Pentapeptide Antagonist.

Jérôme Cluzeau, Shinya Oishi, Hiroaki Ohno, Zixuan Wang,  
Barry Evans, Stephen C. Peiper and Nobutaka Fujii\*

Graduate School of Pharmaceutical Sciences, Kyoto University, Sakyo-ku, Kyoto 606-8501, Japan.

Email: [nfujii@pharm.kyoto-u.ac.jp](mailto:nfujii@pharm.kyoto-u.ac.jp), Fax: +81 75 753 4570, Tel: +81 75 753 4551.

<sup>a</sup> Department of Pathology and Immunotherapy Center, Medical College of Georgia, Augusta, Georgia 30912, USA

### Experimental and analytical data

**Methyl (R)-2-(N-Boc-amino)-5-(triisopropylsilyloxy) pentanoate D-6 [ Boc-D-Hnv(TIPS)-OMe ]:** Product was prepared on the same way as L-6 from methyl (R)-2-(N-Boc-amino)-5-hydroxypentanoate (8.60 g, 34.5 mmol) to give as an inseparable mixture (88/12) of D-6 and TIPSOH (14.0 g, 88%). MS (FAB<sup>+</sup>) :  $m/z = 404$  (M + H<sup>+</sup>).

**(R)-2-(N-Boc-amino)-5-(triisopropylsilyloxy)pentan-1-ol D-7 :** Product was prepared on the same way as L-7 from D-6 containing 12% of TIPSOH (8.60 g, 21.3 mmol) to give D-7 (7.00 g, 99%). <sup>1</sup>H NMR (CDCl<sub>3</sub>)  $\delta$  identical to L-7.  $[\alpha]_D^{22} +4.4$  (c=1.0, CHCl<sub>3</sub>), MS (FAB<sup>+</sup>)  $m/z$  376 (M + H<sup>+</sup>), 398 (M + Na<sup>+</sup>); HRMS calcd for C<sub>19</sub>H<sub>42</sub>NO<sub>4</sub>Si<sup>+</sup> (MH<sup>+</sup>) 376.2883, found 376.2886.

**(R)- N<sup>1</sup>-Allyl-N<sup>2</sup>-Boc-N<sup>1</sup>-(o-nitrobenzenesulfonyl)-5-(triisopropylsilyloxy)pentane-1,2-diamine D-8 :** Reaction was done on the same way as for L-8 using alcohol D-7 (7.00 g, 18.6 mmol) to furnish product D-8 (7.45 g, 66%). MS (FAB<sup>+</sup>)  $m/z$  599 (M<sup>+</sup>); HRMS calcd for C<sub>28</sub>H<sub>49</sub>N<sub>3</sub>O<sub>7</sub>SSi<sup>+</sup> (M<sup>+</sup>) 599.3060, found 599.3065.  $[\alpha]_D^{20} +21.6^\circ$  (c=1.00)

**Methyl (S)-2-[N-Allyl-(4-benzyloxyphenyl)acetamido]-5-(triisopropylsilyloxy)pentanoate 13b :** Amine L-10 (3.00 g, 8.73 mmol), 2-(4-benzyloxyphenyl)acetic acid **12** (4.23 g, 2 eq) and HATU (6.64 g, 2 eq) were dissolved in DMF (85 ml). Et<sub>3</sub>N (3.6 ml, 3 eq) was added dropwise and the reaction was stirred for 3 h at rt. The reaction was partitioned between ether and HCl 0.5M solution. Aqueous phase was extracted twice with ether. Combined organic phases were successively washed with water and brine, dried over MgSO<sub>4</sub> and concentrated. Oil was purified by flash chromatography using hexane/EtOAc (90/10 to 80/20) to furnish **13b** (4.25 g, 86%). <sup>1</sup>H NMR (CDCl<sub>3</sub>)  $\delta$  7.44-7.28 (m, 5H), 7.15 (m, 2H), 6.92 (m, 2H), 5.78 (ddt, 1H,  $J_{d1} = 17.6$  Hz,  $J_{d2} = 12.2$  Hz,  $J_t = 5.1$  Hz), 5.20 (m, 2H), 5.04 (s, 2H), 4.80 (dd, 1H,  $J = 5.8$  Hz,  $J = 8.8$  Hz), 3.98 (dd, 1H,  $J = 5.9$  Hz,  $J = 17.6$  Hz), 3.84 (dd, 1H,  $J = 5.4$  Hz,  $J = 17.8$  Hz), 3.65 (m, 7H), 2.06 (m, 1H), 1.84 (m, 1H), 1.53 (m, 2H), 1.05 (m, 21H). <sup>13</sup>C (CDCl<sub>3</sub>)  $\delta$  172.1, 171.9, 157.7, 137.0, 134.3, 129.9, 129.8, 128.5, 127.9, 127.4, 127.0, 117.3, 115.0, 70.0, 62.7, 57.5, 51.9, 49.3, 40.1, 29.8, 25.6, 18.0, 11.9. FTIR (cm<sup>-1</sup>) 2943, 2865, 1739, 1649, 1612, 1510, 1455, 1240, 1176, 1103. MS (FAB<sup>+</sup>)  $m/z$  568 (M + H<sup>+</sup>); HRMS calcd for C<sub>33</sub>H<sub>50</sub>NO<sub>5</sub>Si<sup>+</sup> (MH<sup>+</sup>) 568.3453, found 568.3449.

**(S)-2-[N-Allyl-(4-benzyloxyphenyl)acetamido]-5-(triisopropylsilyloxy)pentanoic acid 3b :** Ester **13b** (4.25 g, 7.48 mmol) was dissolved in THF/H<sub>2</sub>O/MeOH (3/1/1, 75 ml), cooled down to 0°C and treated with LiOH·H<sub>2</sub>O (942 mg, 3 eq). The reaction was stirred for 3 h at 0°C and was diluted with EtOAc and 0.5 M HCl solution. Aqueous phase was extracted with EtOAc. Combined

organic phases were washed with brine, dried over MgSO<sub>4</sub> and concentrated. Oil was purified by flash chromatography using hexane/EtOAc (90/10 to 60/40) to furnish **3b** (2.83 g, 68%). <sup>1</sup>H NMR (CDCl<sub>3</sub>) δ 7.44-7.29 (m, 5H), 7.14 (m, 2H), 6.92 (m, 2H), 5.76 (ddt, 1H, *J*<sub>d1</sub> = 17.8 Hz, *J*<sub>d2</sub> = 12.2 Hz, *J*<sub>t</sub> = 5.4 Hz), 5.23 (m, 2H), 5.07 (s, 2H), 4.48 (dd, 1H, *J* = 6.8 Hz, *J* = 8.0 Hz), 4.03 (dd, 1H, *J* = 5.8 Hz, *J* = 17.3 Hz), 3.86 (dd, 1H, *J* = 5.6 Hz, *J* = 17.3 Hz), 3.70 (m, 4H), 2.15 (m, 1H), 1.96 (m, 1H), 1.57 (m, 2H), 1.05 (m, 21H). MS (FAB<sup>+</sup>) *m/z* 554 (M + H<sup>+</sup>); HRMS calcd for C<sub>32</sub>H<sub>48</sub>NO<sub>5</sub>Si<sup>+</sup> (MH<sup>+</sup>) 554.3296, found 554.3304.

**(2*RS*)-2-[*N*-Allyl-3-(4-benzyloxyphenyl)propanamido]-*N*-[(2*R*)-1-(*N*-allyl-*o*-nitrophenylsulfonamido)-5-triisopropylsilyloxy]pentan-2-yl]-5-triisopropylsilyloxy]pentanamide (2*RS*,2'*R*)-16/17** : Protocol was similar to the one used for the synthesis of **14/15** with **D-8** (2.35 g, 3.92 mmol) and gave **D-4** (1.84 g, 94%). Acid **3a** (1.62 g, 2.85 mmol) and amine **D-4** (1.85 g, 1.3 eq) were coupled as described for the synthesis of **14/15** to give **16/17** (2.72 g, 91%) as a 1:1 mixture of two diastereomers. MS (FAB<sup>+</sup>) *m/z* 1049 (M + H<sup>+</sup>), 1071 (M + Na<sup>+</sup>); HRMS calcd for C<sub>56</sub>H<sub>89</sub>N<sub>4</sub>O<sub>9</sub>SSi<sub>2</sub><sup>+</sup> (MH<sup>+</sup>) 1049.5889, found 1049.5894.

**(2*R*)- and (2*S*)-2-[*N*-Allyl-(4-benzyloxyphenyl)acetamido]-*N*-[(2*R*)-1-(*N*-allyl-*o*-nitrophenylsulfonamido)-5-triisopropylsilyloxy]pentan-2-yl]-5-triisopropylsilyloxy]pentanamide (2*R*,2'*R*)-20 and (2*S*,2'*R*)-21** : Acid **3b** (1.35 g, 2.44 mmol) and amine **D-4** (1.58 g, 1.3 eq) were coupled as described for the synthesis of **14/15**. Purification by flash chromatography using hexane/EtOAc (75/25) furnished two diastereomers **(2*R*,2'*R*)-20** (0.937 g, 37%) and **(2*S*,2'*R*)-21** (1.35 g, 53%). First to elute **(2*R*,2'*R*)-20** : <sup>1</sup>H NMR (CDCl<sub>3</sub>) δ identical to **(2*S*,2'*S*)-18**. MS (FAB<sup>+</sup>) *m/z* 1035 (M + H<sup>+</sup>), 1057 (M + Na<sup>+</sup>); HRMS calcd for C<sub>55</sub>H<sub>87</sub>N<sub>4</sub>O<sub>9</sub>Si<sub>2</sub>S<sup>+</sup> (MH<sup>+</sup>) 1035.5727, found 1035.5741; Second to elute **(2*S*,2'*R*)-21** : <sup>1</sup>H NMR (CDCl<sub>3</sub>) δ identical to **(2*R*,2'*S*)-19**. MS (FAB<sup>+</sup>) *m/z* 1035 (M + H<sup>+</sup>), 1057 (M + Na<sup>+</sup>); HRMS calcd for C<sub>55</sub>H<sub>87</sub>N<sub>4</sub>O<sub>9</sub>SSi<sub>2</sub><sup>+</sup> (MH<sup>+</sup>) 1035.5732, found 1035.5745.

**(2*R*,5*R*,6*E*)-2,5-Bis[3-(triisopropylsilyloxy)propyl]-1-[3-(4-benzyloxyphenyl)propionyl]-7-(*o*-nitrobenzenesulfonyl)-1,4,7-triazacycloundec-9-en-3-one (2*R*,5*R*,6*E*)-24 and its (2*S*,5*R*,6*E*)-isomer 25**: **(2*RS*,2'*R*)-16/17** (2.70 g, 2.57 mmol) was dissolved in DCM (850 ml, 3 mM). Solution was degassed for 5 min by bubbling argon, Grubbs II cat (400 mg, 0.18 eq) was then added. Reaction was stirred for 12 h under reflux. Volatile was removed and products were purified by flash chromatography using hexane/EtOAc (90/10 to 60/40) and furnished two diastereomers **(2*R*,5*R*,6*E*)-24** (0.990 g, 38%) and **(2*S*,5*R*,6*E*)-25** (0.913 g, 35%). First to elute : **(2*R*,5*R*,6*E*)-24** : <sup>1</sup>H NMR (CDCl<sub>3</sub>) δ identical to **(2*S*,5*S*,6*E*)-22**, MS (FAB<sup>+</sup>) *m/z* 1021 (M<sup>+</sup>), 977 (M<sup>+</sup> - *i*Pr). Second to elute : **(2*S*,5*R*,6*E*)-25** : <sup>1</sup>H NMR (CDCl<sub>3</sub>) δ identical to **(2*R*,5*S*,6*E*)-23**, MS (FAB<sup>+</sup>) *m/z* 1021 (M<sup>+</sup>), 977 (M<sup>+</sup> - *i*Pr).

**(2*S*,5*S*,6*E*)-2,5-Bis[3-(triisopropylsilyloxy)propyl]-1-(4-benzyloxyphenylacetyl)-7-*o*-nitrobenzenesulfonyl-1,4,7-triazacycloundec-9-en-3-one (2*S*,5*S*,6*E*)-26** : Protocol similar to **24/25** using **(2*S*,2'*S*)-18** (1.1 g, 1.06 mmol) which furnished after purification **(2*S*,5*S*,6*E*)-26** (740 mg, 69%) : <sup>1</sup>H NMR (CDCl<sub>3</sub>, 1.5 to 1 mixture of 2 rotamers) δ 7.92 (dd, 1H maj, *J* = 7.8 Hz, *J* = 1.5 Hz), 7.83 (dd, 1H min, *J* = 7.3 Hz, *J* = 1.9 Hz), 7.74-7.58 (m, 3H), 7.48-7.36 (m, 5H), 7.33 (m, 1H), 7.15 (m, 2H), 6.93 (d, 2H maj, *J* = 8.5 Hz), 6.23 (d, 1H, *J* = 6.1 Hz), 5.56 (m, 2H maj + 1H min), 5.39 (m, 1H min), 5.21 (d, 1H min, *J* = 11.5 Hz), 5.14 (t, 1H maj, *J* = 7.7 Hz), 5.06 (m, 1H min + 2H maj), 4.69 (d, 1H min, *J* = 16.8 Hz), 4.33 (d, 1H maj, *J* = 12.7 Hz), 4.17 (m, 1H min), 4.06 (d, 1H maj, *J* = 19.3 Hz), 3.93 (d, 1H min, *J* = 14.2 Hz), 3.80-3.66 (m, 8H), 3.31 (m, 2H), 3.17 (m, 1H), 2.00-1.30 (m, 8H), 1.05 (m, 42H). MS (FAB<sup>+</sup>) *m/z* 1007 (M<sup>+</sup>), 963 (M<sup>+</sup> - *i*Pr).

**(2*R*,5*S*,6*E*)-2,5-Bis[3-(triisopropylsilyloxy)propyl]-1-(4-benzyloxyphenylacetyl)-7-*o*-**

**nitrobenzenesulfonyl-1,4,7-triazacycloundec-9-en-3-one (2R,5S,6E)-27** : Protocol similar to **24/25** using (2R,2'S)-**19** (1.2 g, 1.16 mmol) which furnished after purification (2R,5S,6E)-**27** (755 mg, 65%): <sup>1</sup>H NMR (CDCl<sub>3</sub>, 1 to 1 mixture of 2 rotamers) δ 7.99-7.92 (m, 1H), 7.69 (m, 2H), 7.61 (m, 1H), 7.44-7.27 (m, 6H), 7.17 (d, 1H, *J* = 8.5 Hz), 7.06 (d, 1H, *J* = 8.3 Hz), 6.94 (d, 1H, *J* = 8.8 Hz), 5.76 (d, 0.5H, *J* = 7.1 Hz), 5.55 (m, 1H), 5.45 (m, 1H), 5.20 (t, 0.5H, *J* = 7.7 Hz), 5.07 (m, 2H), 4.63 (d, 0.5H, *J* = 14.4 Hz), 4.20 (t, 0.5H, *J* = 7.5 Hz), 4.05 (d, 0.5H, *J* = 17.5 Hz), 3.86 (d, 1H, *J* = 14.1 Hz), 3.77 (d, 1H, *J* = 14.6 Hz), 3.70-3.41 (m, 8H), 3.24 (m, 2H), 1.92-1.74 (m, 2H), 1.50-1.32 (m, 6H), 1.05 (m, 42H). MS (FAB<sup>+</sup>) *m/z* 1007 (M<sup>+</sup>), 963 (M<sup>+</sup> - *i*Pr).

**(2R,5R,6E)-2,5-Bis[3-(triisopropylsilyloxy)propyl]-1-(4-benzyloxyphenylacetyl)-7-*o*-nitrobenzenesulfonyl-1,4,7-triazacycloundec-9-en-3-one (2R,5R,6E)-28** : Protocol similar to **24/25** using (2R,2'R)-**20** (0.832 g, 0.80 mmol) which furnished after purification (2R,5R,6E)-**28** (0.576 g, 71%): <sup>1</sup>H NMR (CDCl<sub>3</sub>) δ identical to (2S,5S,6E)-**26**. MS (FAB<sup>+</sup>) *m/z* 1007 (M<sup>+</sup>), 963 (M<sup>+</sup> - *i*Pr).

**(2S,5R,6E)-2,5-Bis[3-(triisopropylsilyloxy)propyl]-1-(4-benzyloxyphenylacetyl)-7-*o*-nitrobenzenesulfonyl-1,4,7-triazacycloundec-9-en-3-one (2S,5R,6E)-29** : Protocol similar to **24/25** using (2S,2'R)-**21** (1.2 g, 1.17 mmol) which furnished after purification (2S,5R,6E)-**29** (0.783, 67%): <sup>1</sup>H NMR (CDCl<sub>3</sub>) δ identical to (2R,5S,6E)-**27**. MS (FAB<sup>+</sup>) *m/z* 1007 (M<sup>+</sup>), 963 (M<sup>+</sup> - *i*Pr).

**(2R,5S,6E)-2,5-Bis[3-(triisopropylsilyloxy)propyl]-1-[3-(4-benzyloxyphenyl)propionyl]-7-(2-naphthylacetyl)-1,4,7-triazacycloundec-9-en-3-one (2R,5S,6E)-31** : Protocol similar to the one used for (2S,5S,6E)-**30** using (2R,5S,6E)-**23** (919 mg, 0.90 mmol) which furnished after purification (2R,5S,6E)-**31** (718 mg, 80%) : <sup>1</sup>H NMR (CDCl<sub>3</sub>) δ 7.82 (m, 3H), 7.68 (s, 1H), 7.47-7.28 (m, 8H), 7.15 (m, 2H), 6.89 (m, 2H), 5.31-5.17 (m, 2H), 5.01 (m, 3H), 4.22 (br s, 1H), 3.99 (dd, 1H, *J* = 6.0 Hz, *J* = 14.6 Hz), 3.86 (s, 2H), 3.81 (m, 2H), 3.67 (m, 4H), 3.45 (m, 1H), 3.05 (m, 2H), 2.89 (m, 1H), 2.04 (t, 2H, *J* = 7.1 Hz), 2.38 (dd, 1H, *J* = 7.6 Hz, *J* = 13.9 Hz), 1.88 (m, 1H), 1.63 (m, 4H), 1.39 (m, 3H), 1.04 (m, 42H). MS (FAB<sup>+</sup>) *m/z* 1004 (M + H<sup>+</sup>), 960 (M<sup>+</sup> - *i*Pr); HRMS calcd for C<sub>60</sub>H<sub>90</sub>N<sub>3</sub>O<sub>6</sub>Si<sub>2</sub><sup>+</sup> (MH<sup>+</sup>) 1004.6368, found 1004.6349.

**(2R,5R,6E)-2,5-Bis[3-(triisopropylsilyloxy)propyl]-1-[3-(4-benzyloxyphenyl)propionyl]-7-(2-naphthylacetyl)-1,4,7-triazacycloundec-9-en-3-one (2R,5R,6E)-32** : Protocol similar to the one used for (2S,5S,6E)-**30** using (2R,5R,6E)-**24** (967 mg, 0.95 mmol) which furnished after purification (2R,5R,6E)-**32** (412 mg, 44%) : <sup>1</sup>H NMR (CDCl<sub>3</sub>) δ identical to (2S,5S,6E)-**30**. MS (FAB<sup>+</sup>) *m/z* 1004 (M + H<sup>+</sup>), 960 (M<sup>+</sup> - *i*Pr); HRMS calcd for C<sub>60</sub>H<sub>90</sub>N<sub>3</sub>O<sub>6</sub>Si<sub>2</sub><sup>+</sup> (MH<sup>+</sup>) 1004.6368, found 1004.6362.

**(2S,5R,6E)-2,5-Bis[3-(triisopropylsilyloxy)propyl]-1-[3-(4-benzyloxyphenyl)propionyl]-7-(2-naphthylacetyl)-1,4,7-triazacycloundec-9-en-3-one (2S,5R,6E)-33** : Protocol similar to the one used for (2S,5S,6E)-**30** using (2S,5R,6E)-**25** (838 mg, 0.82 mmol) which furnished after purification (2S,5R,6E)-**33** (518 mg, 65%) : <sup>1</sup>H NMR (CDCl<sub>3</sub>) δ identical to (2R,5S,6E)-**31**. MS (FAB<sup>+</sup>) *m/z* 1004 (M + H<sup>+</sup>), 960 (M<sup>+</sup> - *i*Pr); HRMS calcd for C<sub>60</sub>H<sub>90</sub>N<sub>3</sub>O<sub>6</sub>Si<sub>2</sub><sup>+</sup> (MH<sup>+</sup>) 1004.6368, found 1004.6374.

**(2S,5S,6E)-2,5-Bis[3-(triisopropylsilyloxy)propyl]-1-(4-benzyloxyphenylacetyl)-7-(2-naphthylacetyl)-1,4,7-triazacycloundec-9-en-3-one (2S,5S,6E)-34** : Protocol similar to the one used for (2S,5S,6E)-**30** using (2S,5S,6E)-**26** (730 mg, 0.72 mmol) which furnished after purification (2S,5S,6E)-**34** (451 mg, 63%) : <sup>1</sup>H NMR showed a complex mixture of rotamers and/or conformers in CDCl<sub>3</sub>. MS (FAB<sup>+</sup>) *m/z* 990 (M + H<sup>+</sup>), 946 (M<sup>+</sup> - *i*Pr); HRMS calcd for C<sub>59</sub>H<sub>88</sub>N<sub>3</sub>O<sub>6</sub>Si<sub>2</sub><sup>+</sup> (MH<sup>+</sup>)

990.6211, found 990.6222.

**(2R,5S,6E)-2,5-Bis[3-(triisopropylsilyloxy)propyl]-1-(4-benzyloxyphenylacetyl)-7-(2-naphthylacetyl)-1,4,7-triazacycloundec-9-en-3-one (2R,5S,6E)-35** : Protocol similar to the one used for (2S,5S,6E)-30 using (2R,5S,6E)-27 (772 mg, 0.77 mmol) which furnished after purification (2R,5S,6E)-35 (505 mg, 66%) : <sup>1</sup>H NMR showed a complex mixture of rotamers and/or conformers in CDCl<sub>3</sub>. MS (FAB<sup>+</sup>) *m/z* 990 (M + H<sup>+</sup>), 946 (M<sup>+</sup> - *i*-Pr); HRMS calcd for C<sub>59</sub>H<sub>88</sub>N<sub>3</sub>O<sub>6</sub>Si<sub>2</sub><sup>+</sup> (MH<sup>+</sup>) 990.6211, found 990.6217.

**(2R,5R,6E)-2,5-Bis[3-(triisopropylsilyloxy)propyl]-1-(4-benzyloxyphenylacetyl)-7-(2-naphthylacetyl)-1,4,7-triazacycloundec-9-en-3-one (2R,5R,6E)-36** : Protocol similar to the one used for (2S,5S,6E)-30 using (2R,5R,6E)-28 (569 mg, 0.56 mmol) which furnished after purification (2R,5R,6E)-36 (319 mg, 57%) : <sup>1</sup>H NMR (CDCl<sub>3</sub>) δ identical to 34. MS (FAB<sup>+</sup>) *m/z* 990 (M + H<sup>+</sup>), 946 (M<sup>+</sup> - *i*-Pr); HRMS calcd for C<sub>59</sub>H<sub>88</sub>N<sub>3</sub>O<sub>6</sub>Si<sub>2</sub><sup>+</sup> (MH<sup>+</sup>) 990.6211, found 990.6205.

**(2S,5R,6E)-2,5-Bis[3-(triisopropylsilyloxy)propyl]-1-(4-benzyloxyphenylacetyl)-7-(2-naphthylacetyl)-1,4,7-triazacycloundec-9-en-3-one (2S,5R,6E)-37** : Protocol similar to the one used for (2S,5S,6E)-30 using (2S,5R,6E)-29 (800 mg, 0.79 mmol) which furnished after purification (2S,5R,6E)-37 (535 mg, 68%) : <sup>1</sup>H NMR (CDCl<sub>3</sub>) δ identical to 35. MS (FAB<sup>+</sup>) *m/z* 990 (M + H<sup>+</sup>), 946 (M<sup>+</sup> - *i*-Pr); HRMS calcd for C<sub>59</sub>H<sub>88</sub>N<sub>3</sub>O<sub>6</sub>Si<sub>2</sub><sup>+</sup> (MH<sup>+</sup>) 990.6211, found 990.6199.

**(2R,5S,6E)-2,5-Bis(3-hydroxypropyl)-1-[3-(4-benzyloxyphenyl)propionyl]-7-(2-naphthylacetyl)-1,4,7-triazacycloundec-9-en-3-one (2R,5S,6E)-39** : Protocol similar to (2S,5S,6E)-38 using (2R,5S,6E)-31 (728 mg, 0.72 mmol) which furnished after purification (2R,5S,6E)-39 (372 mg, 74%) : <sup>1</sup>H NMR (CDCl<sub>3</sub>) δ 7.81 (m, 3H), 7.68 (s, 1H), 7.45-7.28 (m, 8H), 7.14 (m, 2H), 6.90 (m, 2H), 5.81 (d, 1H, *J* = 9.5 Hz), 5.24 (m, 1H), 5.17 (t, 1H, *J* = 7.1 Hz), 5.10 (m, 1H), 5.01 (s, 2H), 4.23 (br s, 1H), 3.99 (dd, 1H, *J* = 6.8 Hz, *J* = 14.9 Hz), 3.87 (s, 2H), 3.81 (m, 2H), 3.61 (m, 4H), 3.43 (dd, 1H, *J* = 8.8 Hz, *J* = 16.6 Hz), 3.17 (dd, 1H, *J* = 8.0 Hz, *J* = 13.9 Hz), 3.00 (m, 1H), 2.89 (m, 1H), 2.62 (m, 2H), 2.51 (dd, 1H, *J* = 7.1 Hz, *J* = 14.1 Hz), 2.00 (m, 2H), 1.75 (m, 1H), 1.65-1.41 (m, 7H). MS (FAB<sup>+</sup>) *m/z* 692 (M + H<sup>+</sup>); HRMS calcd for C<sub>42</sub>H<sub>50</sub>N<sub>3</sub>O<sub>6</sub><sup>+</sup> (MH<sup>+</sup>) 692.3700, found 692.3697.

**(2R,5R,6E)-2,5-Bis(3-hydroxypropyl)-1-[3-(4-benzyloxyphenyl)propionyl]-7-(2-naphthylacetyl)-1,4,7-triazacycloundec-9-en-3-one (2R,5R,6E)-40** : Protocol similar to (2S,5S,6E)-38 using (2R,5R,6E)-32 (382 mg, 0.38 mmol) which furnished after purification (2R,5R,6E)-40 (188 mg, 72%) : <sup>1</sup>H NMR (CDCl<sub>3</sub>) δ identical to (2S,5S,6E)-38. MS (FAB<sup>+</sup>) *m/z* 692 (M + H<sup>+</sup>); HRMS calcd for C<sub>42</sub>H<sub>50</sub>N<sub>3</sub>O<sub>6</sub><sup>+</sup> (MH<sup>+</sup>) 692.3700, found 692.3708.

**(2S,5R,6E)-2,5-Bis(3-hydroxypropyl)-1-[3-(4-benzyloxyphenyl)propionyl]-7-(2-naphthylacetyl)-1,4,7-triazacycloundec-9-en-3-one (2S,5R,6E)-41** : Protocol similar to (2S,5S,6E)-38 using (2S,5R,6E)-33 (485 mg, 0.48 mmol) which furnished after purification (2S,5R,6E)-41 (240 mg, 72%) : <sup>1</sup>H NMR (CDCl<sub>3</sub>) δ identical to (2R,5S,6E)-39. MS (FAB<sup>+</sup>) *m/z* 692 (M + H<sup>+</sup>); HRMS calcd for C<sub>42</sub>H<sub>50</sub>N<sub>3</sub>O<sub>6</sub><sup>+</sup> (MH<sup>+</sup>) 692.3700, found 692.3697.

**(2S,5S,6E)-2,5-Bis(3-hydroxypropyl)-1-(4-benzyloxyphenylacetyl)-7-(2-naphthylacetyl)-1,4,7-triazacycloundec-9-en-3-one (2S,5S,6E)-42** : Protocol similar to (2S,5S,6E)-38 using (2S,5S,6E)-34 (451 mg, 0.45 mmol) which furnished after purification (2S,5S,6E)-42 (182 mg, 59%) : <sup>1</sup>H NMR showed a complex mixture of rotamers and/or conformers in CDCl<sub>3</sub> (at 20°C or 40°C) or in DMSO (at 20°C or 60°C). Purity was verify by RP-HPLC on 4.6 x 250 mm COSMOSIL 5C<sub>18</sub>-AR-II column at 1 ml/min in water/acetonitrile both containing 0.1%TFA [90/10

(0 min), 40/60 (10 min), 10/90 (30 min), 5/95 (35 min)], *rt* = 16.13, purity up to 91%. MS (FAB<sup>+</sup>) *m/z* 678 (M + H<sup>+</sup>); HRMS calcd for C<sub>41</sub>H<sub>48</sub>N<sub>3</sub>O<sub>6</sub><sup>+</sup> (MH<sup>+</sup>) 678.3543, found 678.3554.

**(2*R*,5*S*,6*E*)-2,5-Bis-(3-hydroxypropyl)-1-(4-benzyloxyphenylacetyl)-7-(2-naphthylacetyl)-1,4,7-triazacycloundec-9-en-3-one (2*R*,5*S*,6*E*)-43** : Protocol similar to (2*S*,5*S*,6*E*)-**38** using (2*R*,5*S*,6*E*)-**35** (505 mg, 0.51 mmol) which furnished after purification (2*R*,5*S*,6*E*)-**43** (340 mg, 98%) : <sup>1</sup>H NMR showed a complex mixture of rotamers and/or conformers in CDCl<sub>3</sub> (at 20°C or 40°C) or in DMSO (at 20°C or 60°C). Purity was verify by RP-HPLC on the same way as **42**, *rt* = 16.18, purity up to 96%. MS (FAB<sup>+</sup>) *m/z* 678 (M + H<sup>+</sup>); HRMS calcd for C<sub>41</sub>H<sub>48</sub>N<sub>3</sub>O<sub>6</sub><sup>+</sup> (MH<sup>+</sup>) 678.3543, found 678.3544.

**(2*R*,5*R*,6*E*)-2,5-Bis-(3-hydroxypropyl)-1-(4-benzyloxyphenylacetyl)-7-(2-naphthylacetyl)-1,4,7-triazacycloundec-9-en-3-one (2*R*,5*R*,6*E*)-44** : Protocol similar to (2*S*,5*S*,6*E*)-**38** using (2*R*,5*R*,6*E*)-**36** (315 mg, 0.32 mmol) which furnished after purification (2*R*,5*R*,6*E*)-**44** (194 mg, 90%) : <sup>1</sup>H NMR identical to **42**. Purity was verify by RP-HPLC on the same way as **42**, *rt* = 16.17, purity up to 95%. MS (FAB<sup>+</sup>) *m/z* 678 (M + H<sup>+</sup>); HRMS calcd for C<sub>41</sub>H<sub>48</sub>N<sub>3</sub>O<sub>6</sub><sup>+</sup> (MH<sup>+</sup>) 678.3543, found 678.3541.

**(2*S*,5*R*,6*E*)-2,5-Bis-(3-hydroxypropyl)-1-(4-benzyloxyphenylacetyl)-7-(2-naphthylacetyl)-1,4,7-triazacycloundec-9-en-3-one (2*S*,5*R*,6*E*)-45** : Protocol similar to (2*S*,5*S*,6*E*)-**38** using (2*S*,5*R*,6*E*)-**37** (315 mg, 0.32 mmol) which furnished after purification (2*S*,5*R*,6*E*)-**45** (286 mg, 78%) : <sup>1</sup>H NMR identical to **43**. Purity was verify by RP-HPLC on the same way as **42**, *rt* = 16.13, purity up to 98%. MS (FAB<sup>+</sup>) *m/z* 678 (M + H<sup>+</sup>); HRMS calcd for C<sub>41</sub>H<sub>48</sub>N<sub>3</sub>O<sub>6</sub><sup>+</sup> (MH<sup>+</sup>) 678.3543, found 678.3551.

**(2*R*,5*S*,6*E*)-2,5-Bis(3-guanidinopropyl)-1-[3-(4-hydroxyphenyl)propionyl]-7-(2-naphthylacetyl)-1,4,7-triazacycloundec-9-en-3-one (2*R*,5*S*,6*E*)-55** : Protocol similar to (2*S*,5*S*,6*E*)-**54** using (2*R*,5*S*,6*E*)-**39** (150 mg, 0.22 mmol) which furnished protected bis-guanidine **47** (approx 90 mg) as a mixture with Ph<sub>3</sub>PO and after deprotection and purification (2*R*,5*S*,6*E*)-**55** (28 mg, 19%). MS (FAB<sup>+</sup>) *m/z* 684 (M + H<sup>+</sup>); HRMS calcd for C<sub>37</sub>H<sub>50</sub>N<sub>9</sub>O<sub>4</sub><sup>+</sup> (MH<sup>+</sup>) 684.3986, found 684.3992. [α]<sub>D</sub><sup>23</sup> -71 (c=0.1, AcOH)

**(2*R*,5*R*,6*E*)-2,5-Bis(3-guanidinopropyl)-1-[3-(4-hydroxyphenyl)propionyl]-7-(2-naphthylacetyl)-1,4,7-triazacycloundec-9-en-3-one (2*R*,5*R*,6*E*)-56** : Protocol similar to (2*S*,5*S*,6*E*)-**54** using (2*R*,5*R*,6*E*)-**40** (112 mg, 0.16 mmol) which furnished protected bis-guanidine **48** (approx 55 mg) as a mixture with Ph<sub>3</sub>PO and after deprotection and purification (2*R*,5*R*,6*E*)-**56** (29 mg, 26%). MS (FAB<sup>+</sup>) *m/z* 684 (M + H<sup>+</sup>); HRMS calcd for C<sub>37</sub>H<sub>50</sub>N<sub>9</sub>O<sub>4</sub><sup>+</sup> (MH<sup>+</sup>) 684.3986, found 684.3993. [α]<sub>D</sub><sup>24</sup> +49 (c=0.1, AcOH)

**(2*S*,5*R*,6*E*)-2,5-Bis-(3-guanidinopropyl)-1-(*N*-(3-(4-(hydroxy)phenyl)propionyl)-7-(*N*-(2-naphthylacetyl))-1,4,7-triazacycloundec-9-en-3-one (2*S*,5*R*,6*E*)-57** : Protocol similar to (2*S*,5*S*,6*E*)-**54** using (2*S*,5*R*,6*E*)-**41** (150 mg, 0.22 mmol) which furnished protected bis-guanidine **49** (approx 25 mg) as a mixture with Ph<sub>3</sub>PO and starting material which was resubmitted to give **49** (approx 47 mg) as a mixture with Ph<sub>3</sub>PO. After deprotection and purification (2*S*,5*R*,6*E*)-**57** (14 mg, 10%) and a less pure fraction of **57** (12 mg, purity = 70%) were obtained. MS (FAB<sup>+</sup>) *m/z* 684 (M + H<sup>+</sup>); HRMS calcd for C<sub>37</sub>H<sub>50</sub>N<sub>9</sub>O<sub>4</sub><sup>+</sup> (MH<sup>+</sup>) 684.3986, found 684.3973. [α]<sub>D</sub><sup>21</sup> +67 (c=0.05, AcOH)

**(2*S*,5*S*,6*E*)-2,5-Bis(3-guanidinopropyl)-1-(4-hydroxyphenylacetyl)-7-(2-naphthylacetyl)-1,4,7-triazacycloundec-9-en-3-one (2*S*,5*S*,6*E*)-58** : Protocol similar to (2*S*,5*S*,6*E*)-**54** using

(2*S*,5*S*,6*E*)-**42** (150 mg, 0.22 mmol) in THF/toluene/DMF solution (6/1/1 : 4 ml) which furnished protected bis-guanidine **50** (approx 108 mg) as a mixture with Ph<sub>3</sub>PO. After deprotection and purification (2*S*,5*S*,6*E*)-**58** (59 mg, 40%) was obtained. MS (FAB<sup>+</sup>) *m/z* 670 (M + H<sup>+</sup>); HRMS calcd for C<sub>36</sub>H<sub>48</sub>N<sub>9</sub>O<sub>4</sub><sup>+</sup> (MH<sup>+</sup>) 670.3829, found 670.3822. [ $\alpha$ ]<sub>D</sub><sup>24</sup> -31 (c=0.1, AcOH)

**(2*R*,5*S*,6*E*)-2,5-Bis(3-guanidinopropyl)-1-(4-hydroxyphenylacetyl)-7-(2-naphthylacetyl)-1,4,7-triazacycloundec-9-en-3-one (2*R*,5*S*,6*E*)-59** : Protocol similar to (2*S*,5*S*,6*E*)-**54** using (2*R*,5*S*,6*E*)-**43** (150 mg, 0.22 mmol) which furnished protected bis-guanidine **51** (approx 70 mg) as a mixture with Ph<sub>3</sub>PO. After deprotection and purification (2*R*,5*S*,6*E*)-**59** (28.5 mg, 19%) was obtained. MS (FAB<sup>+</sup>) *m/z* 670 (M + H<sup>+</sup>); HRMS calcd for C<sub>36</sub>H<sub>48</sub>N<sub>9</sub>O<sub>4</sub><sup>+</sup> (MH<sup>+</sup>) 670.3829, found 670.3821. [ $\alpha$ ]<sub>D</sub><sup>25</sup> -39 (c=0.1, AcOH)

**(2*R*,5*R*,6*E*)-2,5-Bis(3-guanidinopropyl)-1-(4-hydroxyphenylacetyl)-7-(2-naphthylacetyl)-1,4,7-triazacycloundec-9-en-3-one (2*R*,5*R*,6*E*)-60** : Protocol similar to (2*S*,5*S*,6*E*)-**54** using (2*R*,5*R*,6*E*)-**44** (150 mg, 0.22 mmol) in THF/toluene/DMF solution (6/1/1 : 4 ml) which furnished protected bis-guanidine **52** (approx 106 mg) as a mixture with Ph<sub>3</sub>PO. After deprotection and purification (2*R*,5*R*,6*E*)-**60** (40.5 mg, 27%) was obtained. MS (FAB<sup>+</sup>) *m/z* 670 (M + H<sup>+</sup>); HRMS calcd for C<sub>36</sub>H<sub>48</sub>N<sub>9</sub>O<sub>4</sub><sup>+</sup> (MH<sup>+</sup>) 670.3829, found 670.3820. [ $\alpha$ ]<sub>D</sub><sup>25</sup> +32 (c=0.1, AcOH)

**(2*S*,5*R*,6*E*)-2,5-Bis(3-guanidinopropyl)-1-(4-hydroxyphenylacetyl)-7-(2-naphthylacetyl)-1,4,7-triazacycloundec-9-en-3-one (2*S*,5*R*,6*E*)-61** : Protocol similar to (2*S*,5*S*,6*E*)-**54** using (2*S*,5*R*,6*E*)-**45** (150 mg, 0.22 mmol) which furnished protected bis-guanidine **53** (approx 40 mg) as a mixture with Ph<sub>3</sub>PO. After deprotection and purification (2*S*,5*R*,6*E*)-**61** (22 mg, 15%) was obtained. MS (FAB<sup>+</sup>) *m/z* 670 (M + H<sup>+</sup>); HRMS calcd for C<sub>36</sub>H<sub>48</sub>N<sub>9</sub>O<sub>4</sub><sup>+</sup> (MH<sup>+</sup>) 670.3829, found 670.3835. [ $\alpha$ ]<sub>D</sub><sup>23</sup> +39 (c=0.1, AcOH)
